# Supplementary material for: Transcriptomic intratumor heterogeneity of breast cancer patient-derived organoids may reflect the unique biological features of the tumor of origin
Source: PubMed Central journal article supplement (PMC9942352; doi:10.1186/s13058-023-01617-4), 2023-02-21
Supplement: 13058_2023_1617_MOESM1_ESM.pdf [file 13058_2023_1617_MOESM1_ESM.pdf]

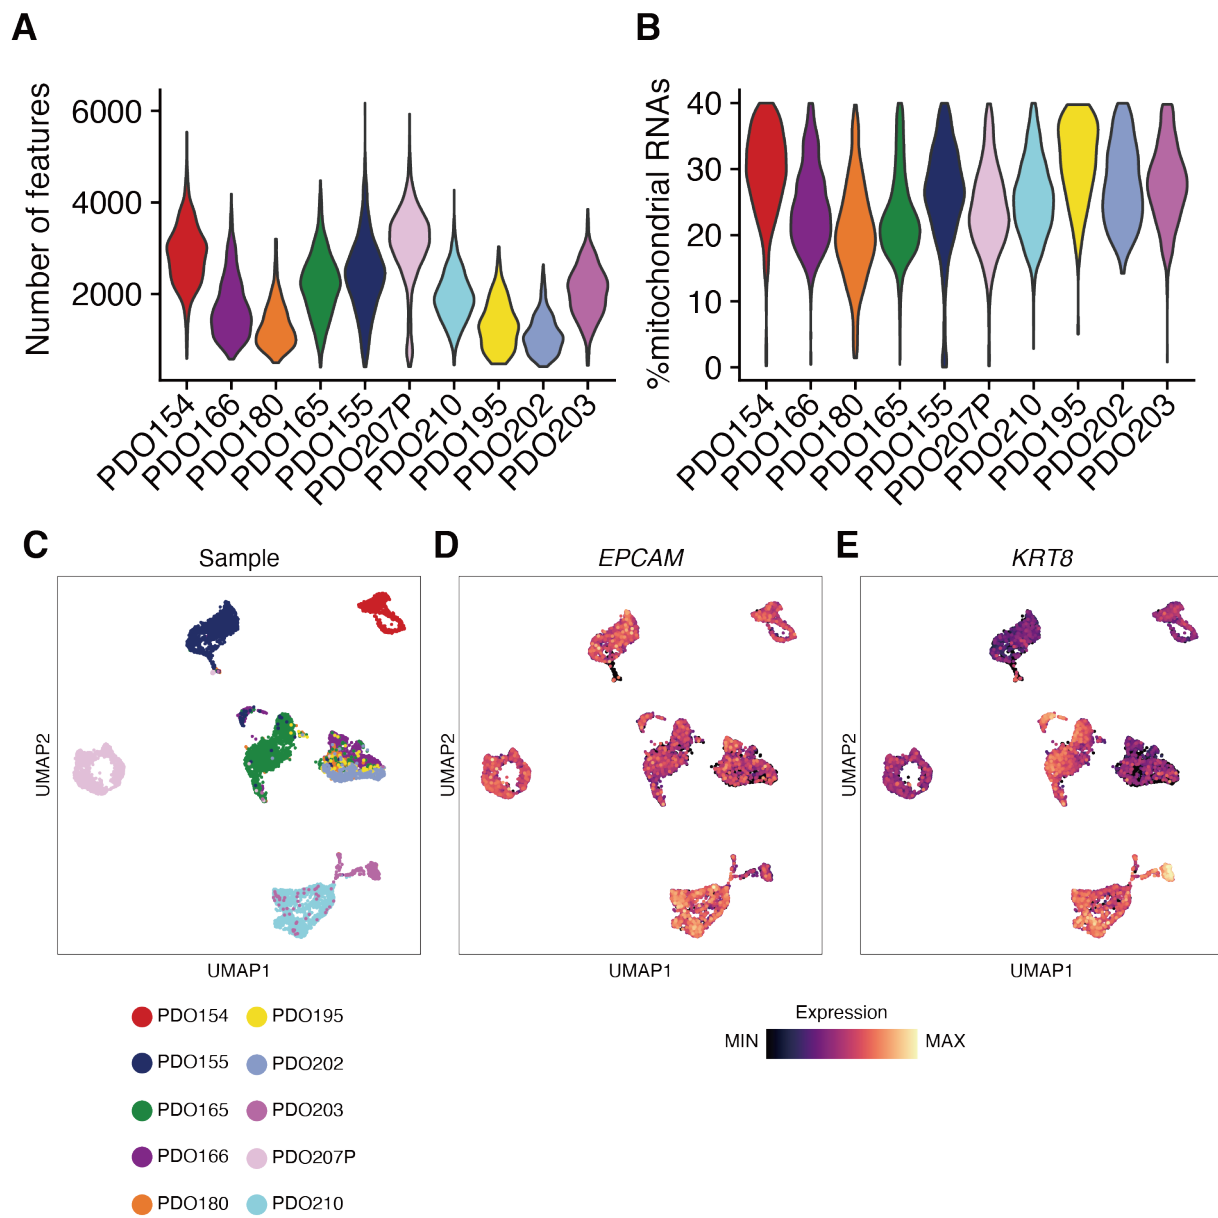

**Supplementary Figure 1**

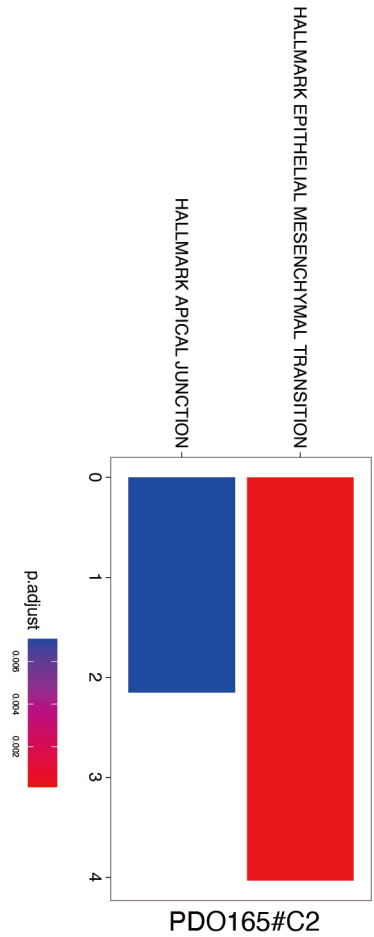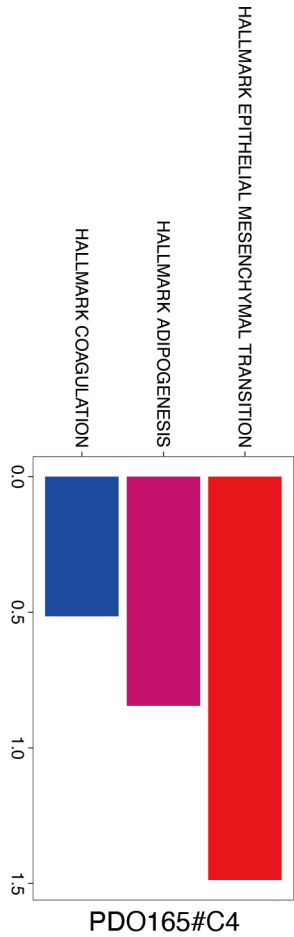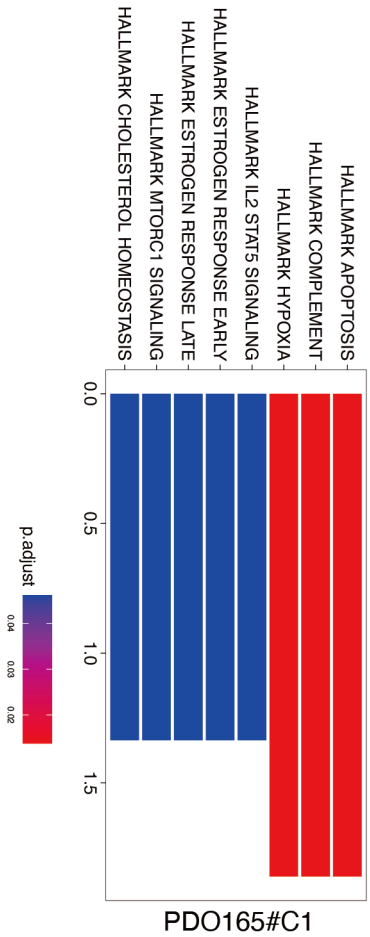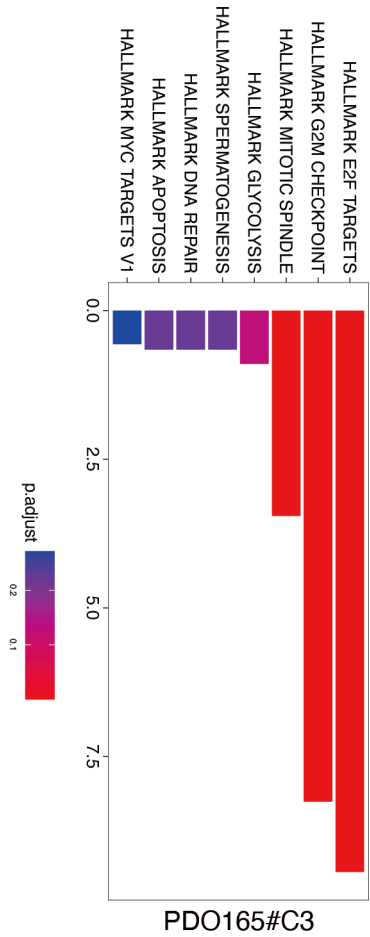

Supplementary Figure 2

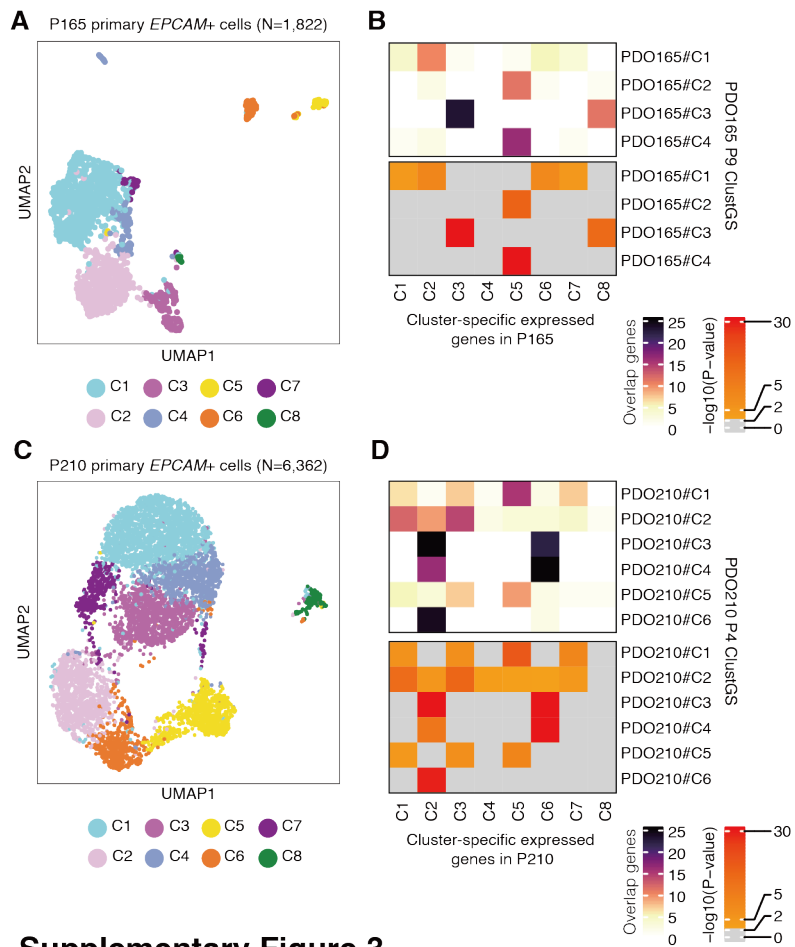

**Supplementary Figure 3**

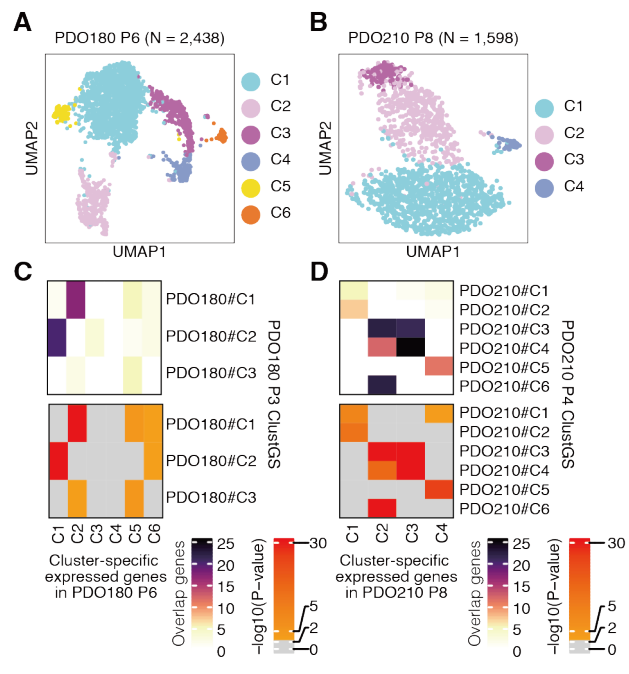

**Supplementary Figure 4**

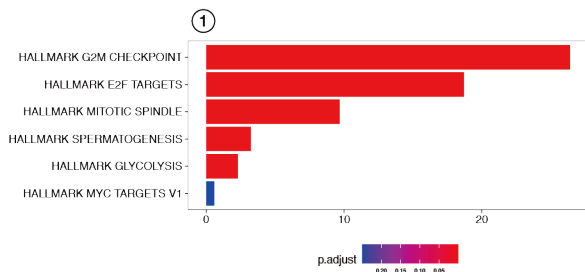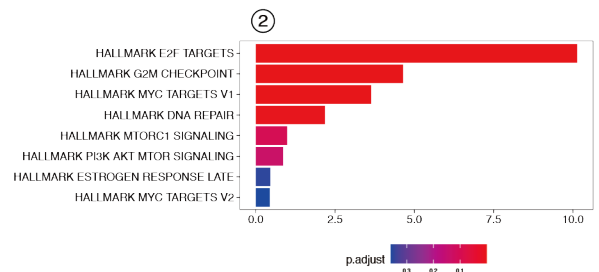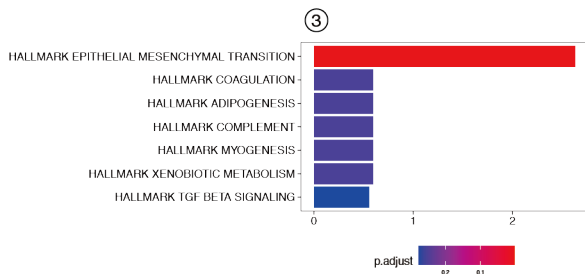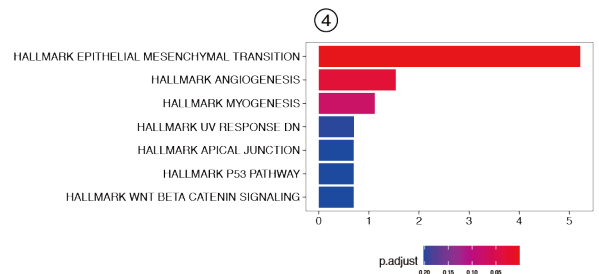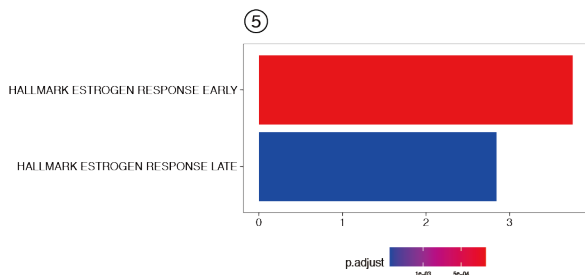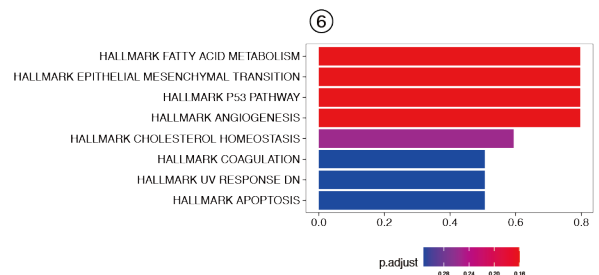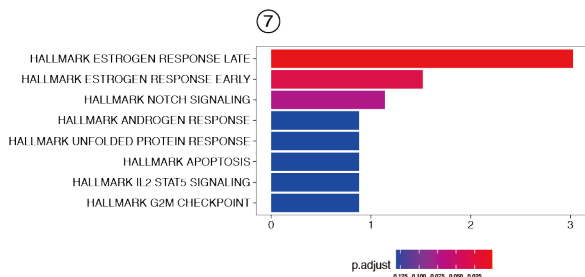

Supplementary Figure 5

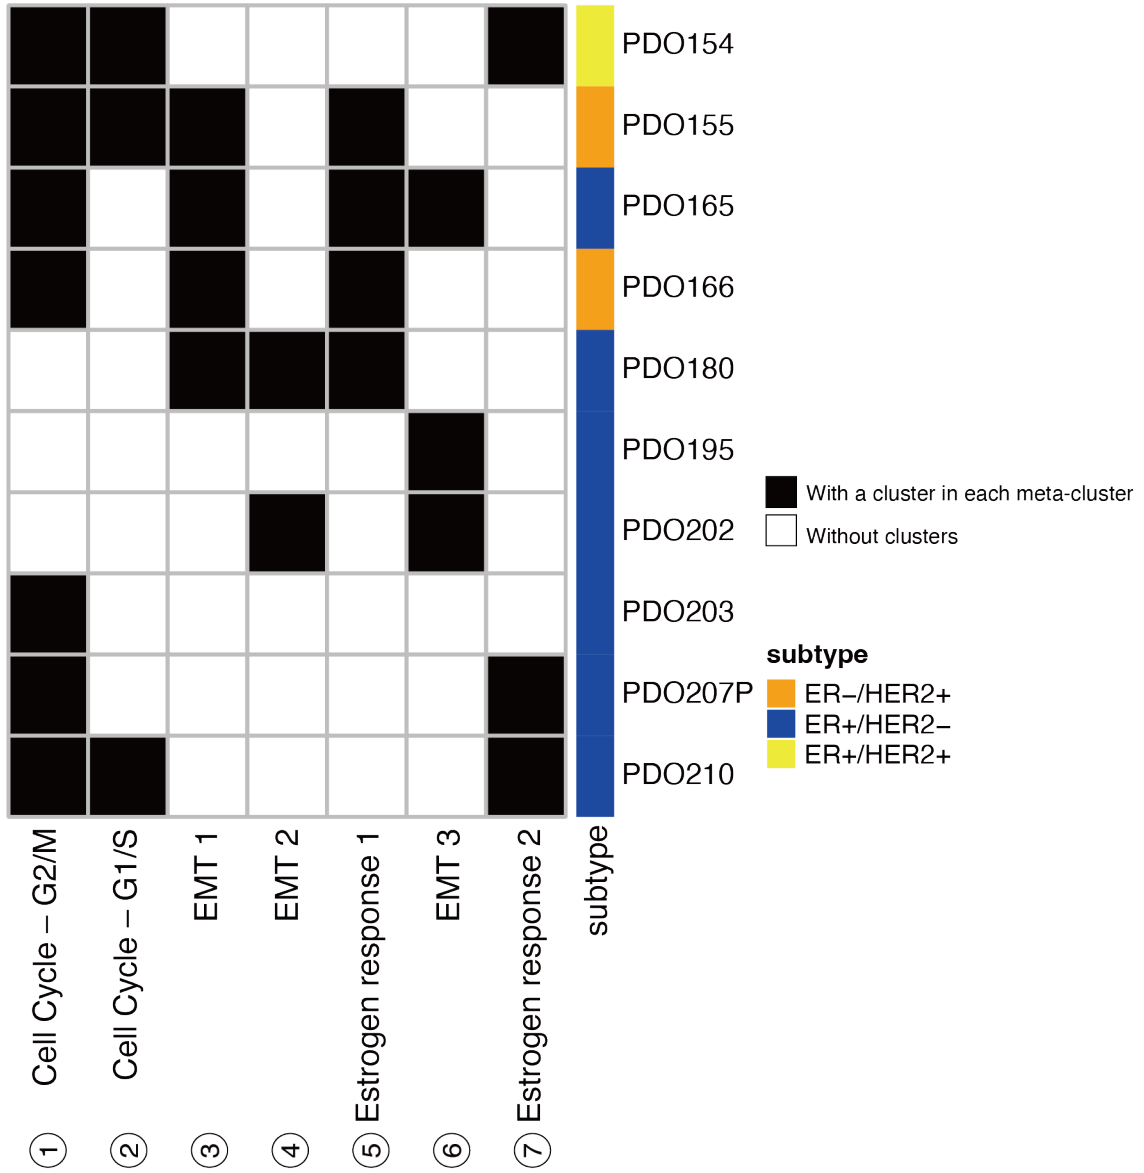

Supplementary Figure 6

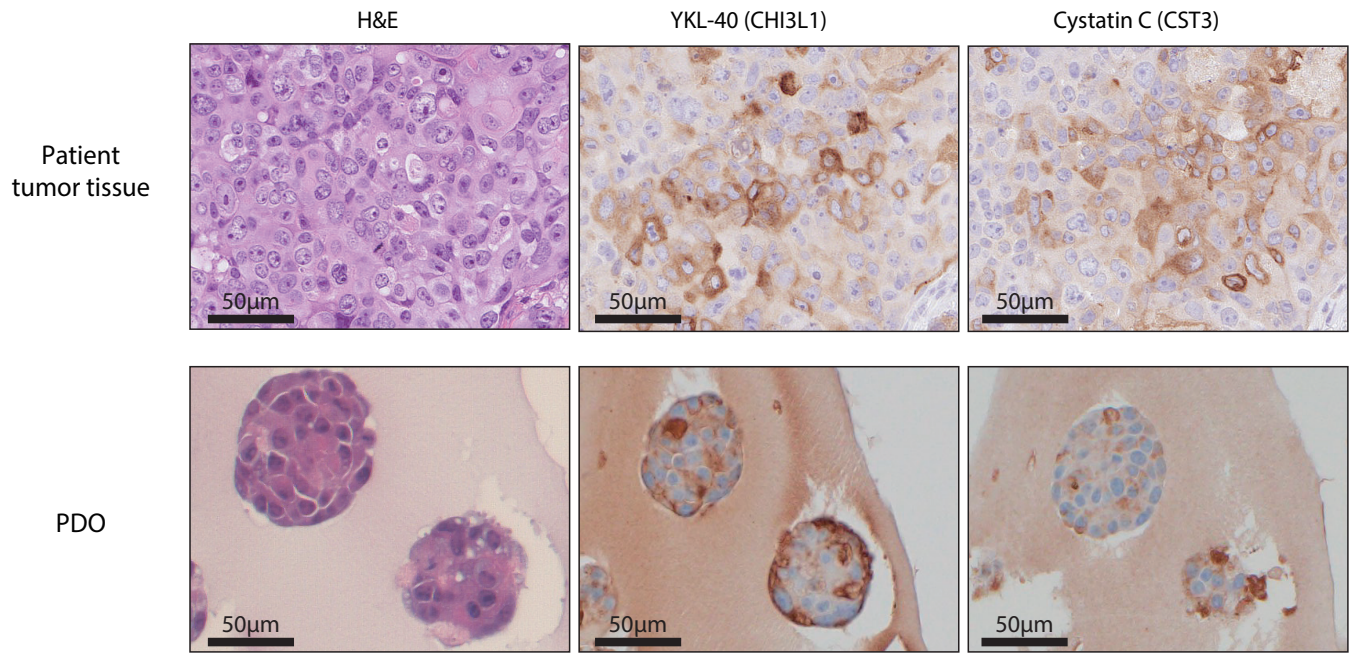

Supplementary Figure 7
